# Supplementary material for: A cobalt-based hybrid electrocatalyst derived from a carbon nanotube inserted metal–organic framework for efficient water-splitting
Source: Royal Society of Chemistry journal article supplement (doi:10.1039/c6ta05829a), 2016-01-01
Supplement: c6ta05829a1.pdf [file c6ta05829a1.pdf]

# A cobalt-based hybrid electrocatalyst derived from carbon nanotube inserted metal-organic framework for efficient water-splitting

Fulin Yang,<sup>a</sup> Pingping Zhao,<sup>a</sup> Xing Hua,<sup>a</sup> Wei Luo,<sup>a\*</sup> Gongzhen Cheng,<sup>a</sup> Wei Xing,<sup>b</sup> and Shengli Chen<sup>a\*</sup>

<sup>a</sup>College of chemistry and molecular sciences, Wuhan University, Wuhan, 430072, P. R. China

<sup>b</sup>Changchun Institute of Applied Chemistry, Chinese Academy of Sciences, Changchun 130022, P. R. China

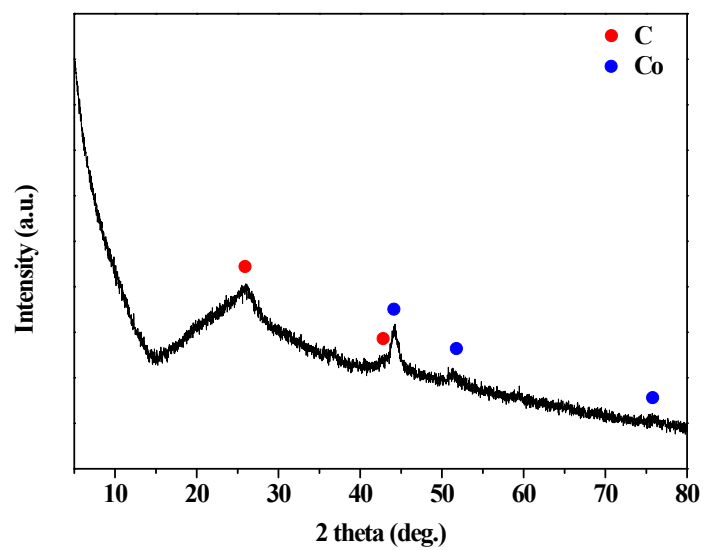

Figure S1 XRD patterns of Co-NC/CNT.

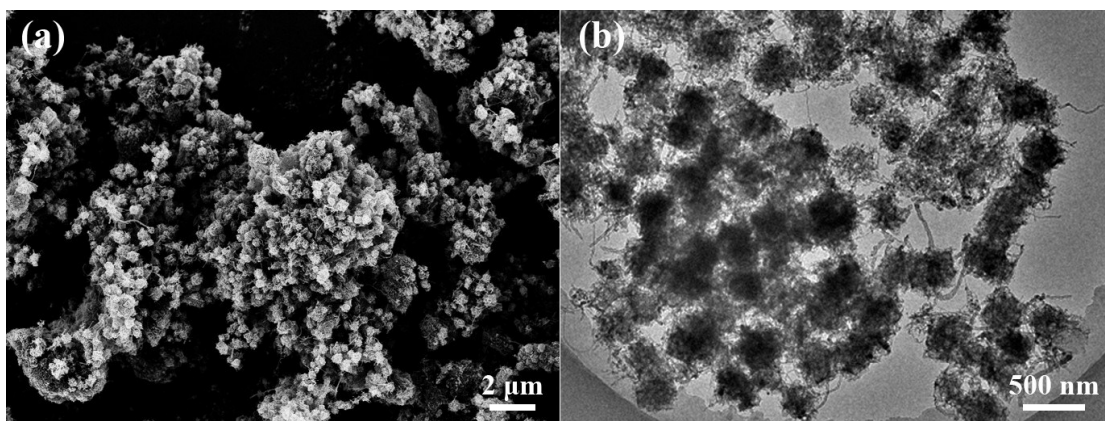

Figure S2 SEM (a) and TEM (b) of Co-NC/CNT.

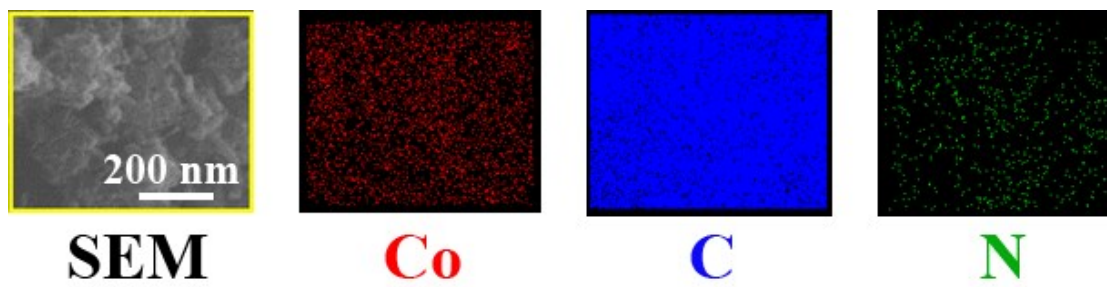

Figure S3 SEM-EDX elemental mapping images of Co-NC/CNT.

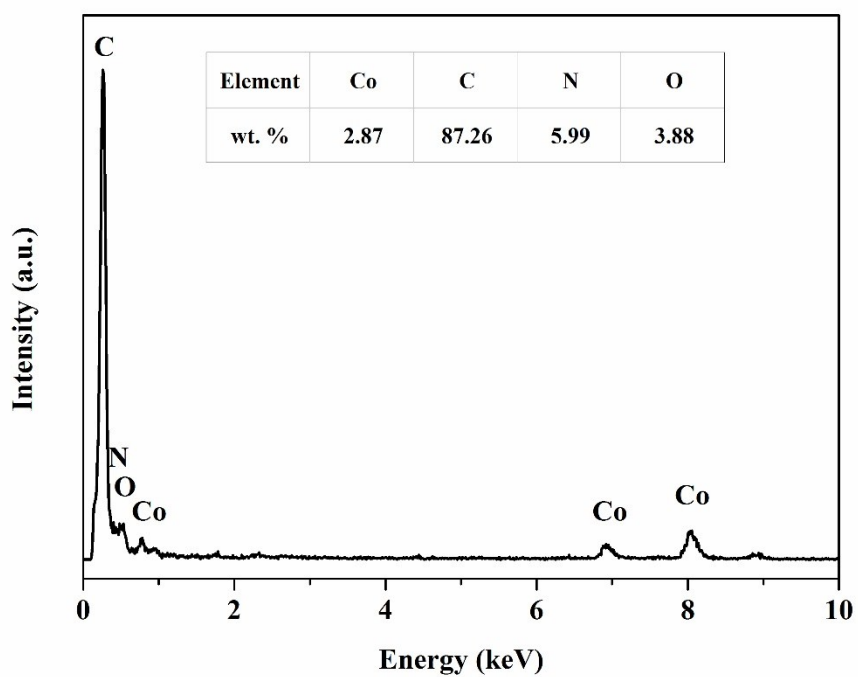

Figure S4 EDX spectrum of Co-NC/CNT.

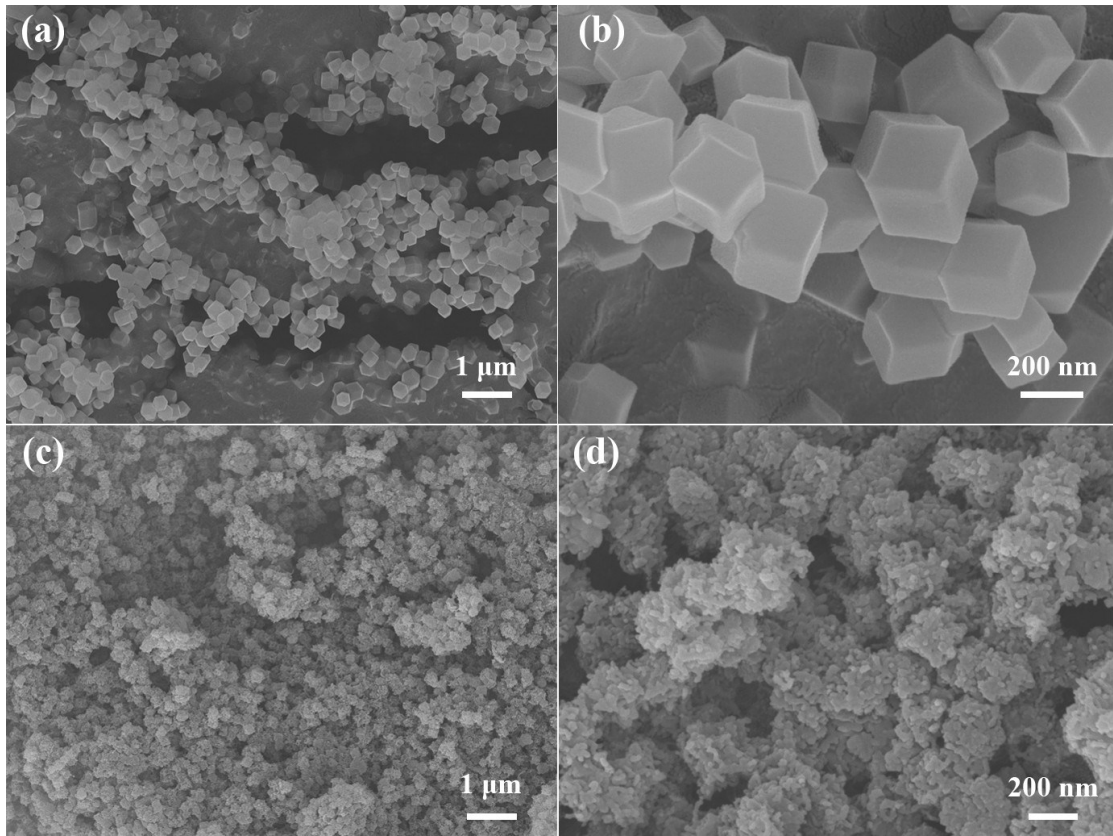

Figure S5 SEM images of ZIF-67 (a, b) and Co-NC (c, d).

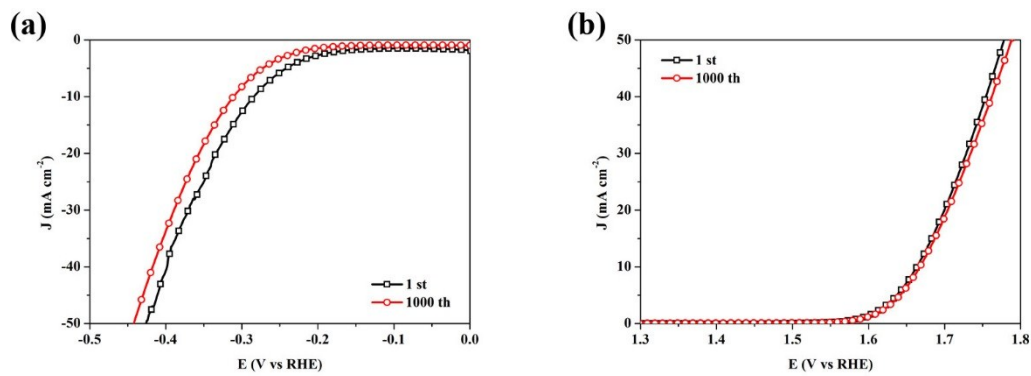

Figure S6 Cycle stability measurement for Co-NC by CV scanning after 1000 cycles for (a) HER and (b) OER.

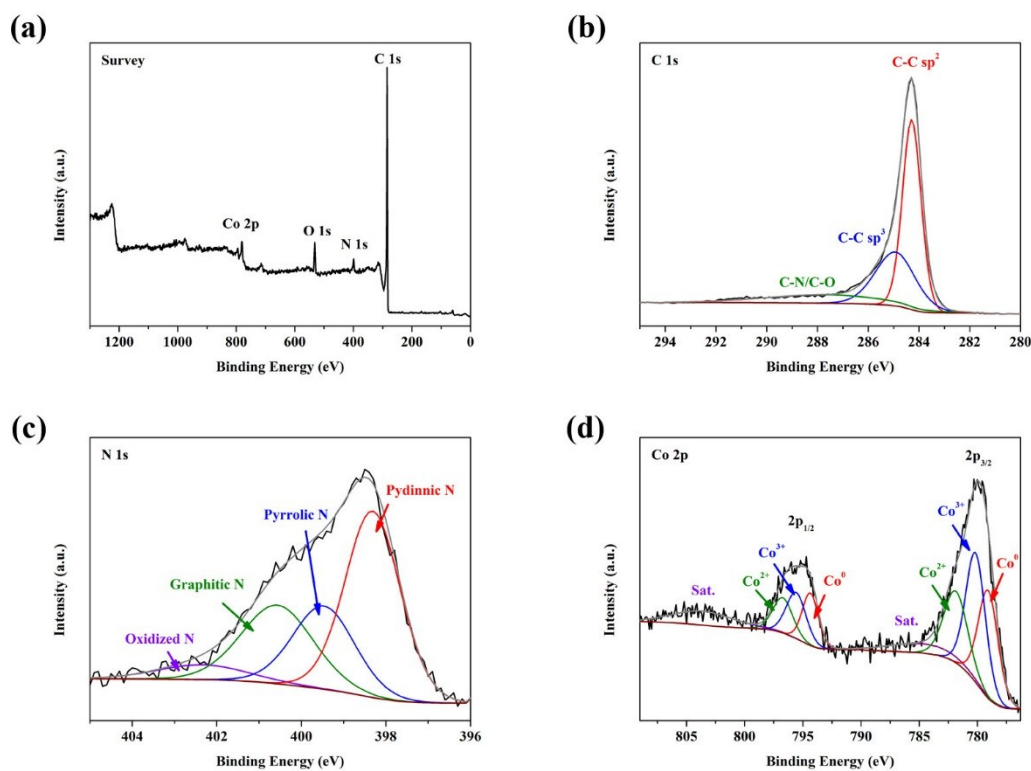

Figure S7 XPS spectra of Co-NC/CNT-700: survey (a), high resolution spectra of C 1s (b), N 1s (c), and Co 2p (d).

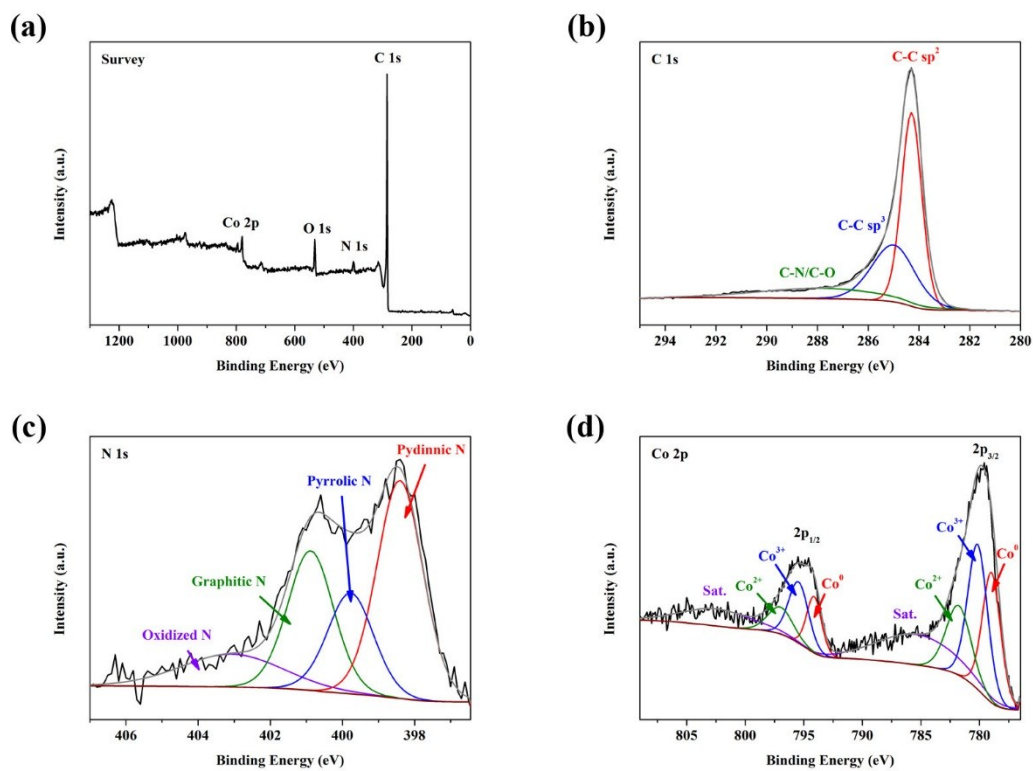

Figure S8 XPS spectra of Co-NC/CNT-900: survey (a), high resolution spectra of C 1s (b), N 1s (c), and Co 2p (d).



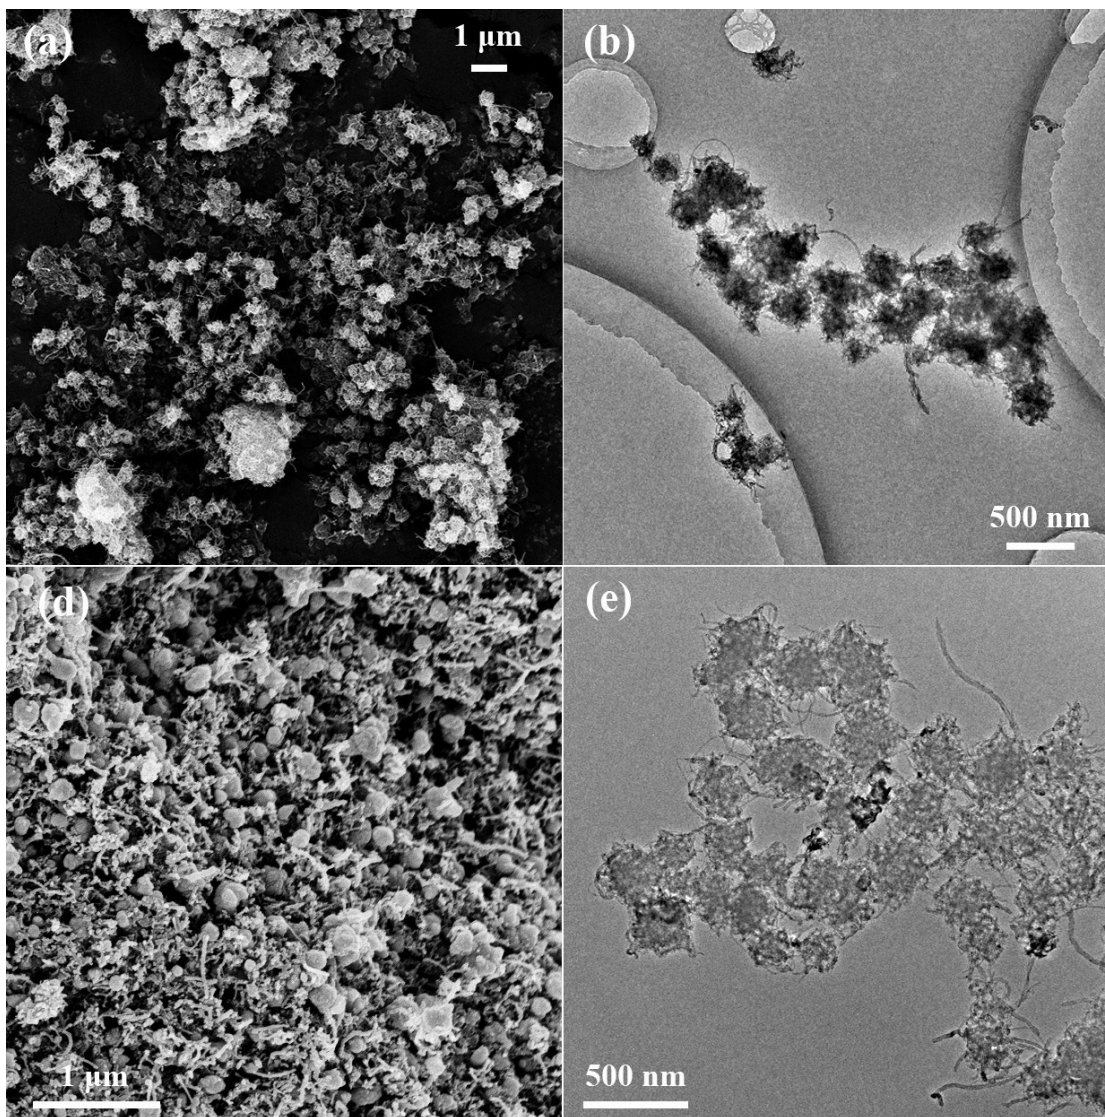

Figure S9 SEM (a, c) and TEM (b, d) images of Co-NC/CNT-700 (a, b) and Co-NC-900 (c, d).

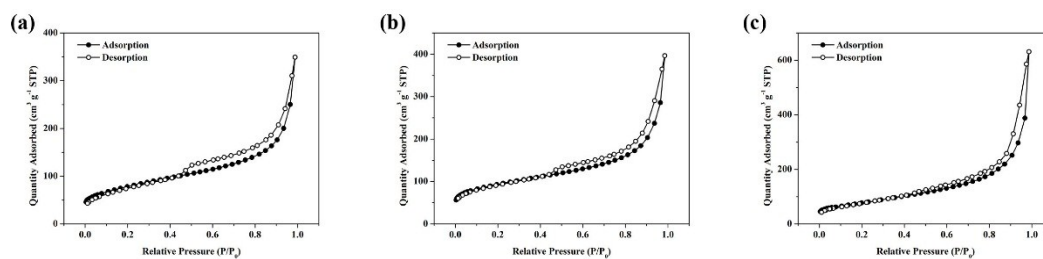

Figure S10 N<sub>2</sub> adsorption-desorption isotherms of Co-NC/CNT-700 (a), Co-NC/CNT-800 (b), and Co-NC/CNT-900 (c), respectively.

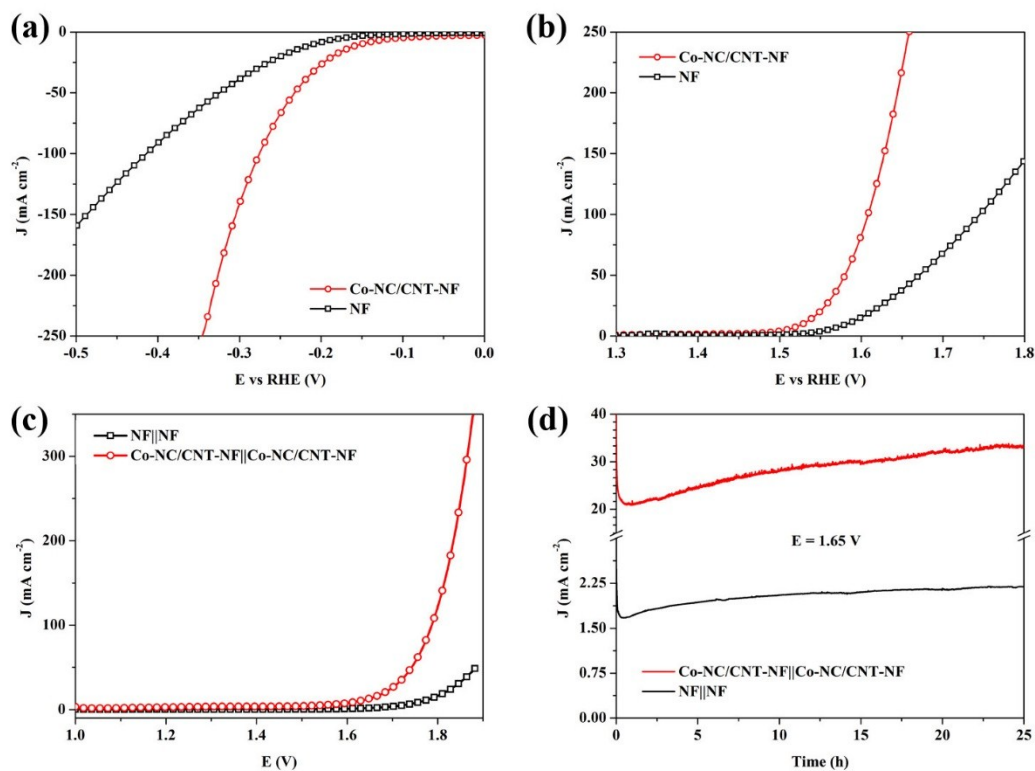

Figure S11 LSV curves of (a) HER and (b) OER with the Co-NC/CNT-NF (nickel foam) (loading:  $\sim 1.2$  mg cm<sup>-2</sup>) or pure nickel foam as the working electrode in three-electrode electrolyzer. (c) LSV curves of water electrolysis in two-electrode electrolyzer with the Co-NC/CNT-NF or pure nickel foam as both anode and cathode in 1.0 M KOH and (d) Chronoamperometry durability test at a constant potential of 1.65 V.



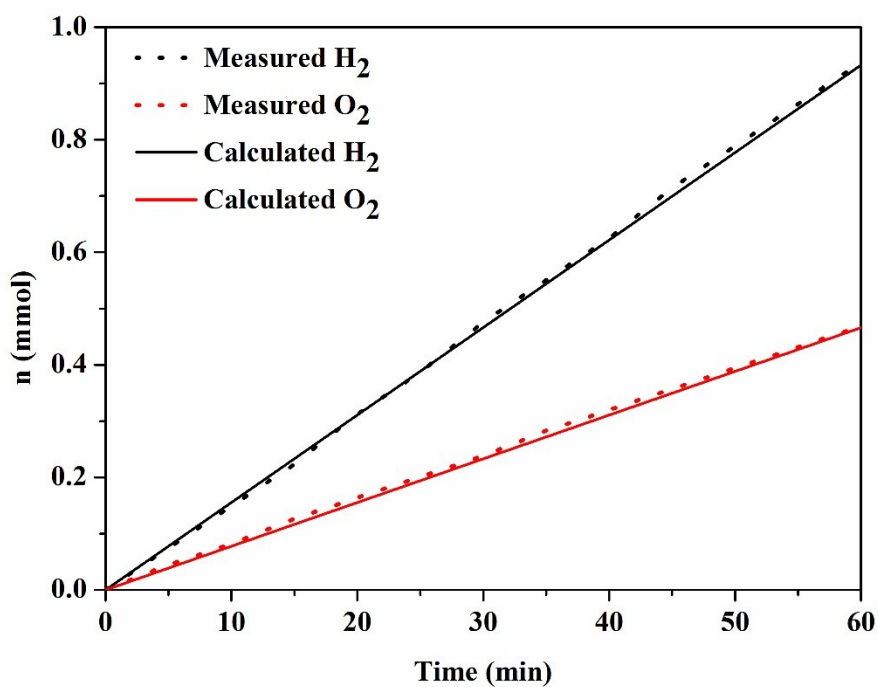

Figure S12 Faraday efficiency of H<sub>2</sub> and O<sub>2</sub> production.

Table S1 Weight percentage of Co, C, N, O of Co-NC/CNT-T obtained by XPS spectrum.

| Samples       | Co (wt. %) | C (wt. %) | N (wt. %) | O (wt. %) |
|---------------|------------|-----------|-----------|-----------|
| Co-NC/CNT-700 | 1.23       | 87.46     | 8.69      | 2.61      |
| Co-NC/CNT-800 | 1.39       | 83.84     | 12.63     | 2.14      |
| Co-NC/CNT-900 | 1.53       | 87.97     | 7.54      | 2.96      |

Table S2 BET surface areas, average pore size, and total pore volumes for Co-NC/CNT with different pyrolysis temperatures (700 °C, 800 °C and 900 °C).

| Samples       | BET Surface Area<br>(m <sup>2</sup> g <sup>-1</sup> ) | Total pore volume<br>(cm <sup>3</sup> g <sup>-1</sup> ) | Average pore<br>diameter (nm) |
|---------------|-------------------------------------------------------|---------------------------------------------------------|-------------------------------|
| Co-NC/CNT-700 | 280.798                                               | 0.540                                                   | 3.655                         |
| Co-NC/CNT-800 | 334.384                                               | 0.613                                                   | 3.662                         |
| Co-NC/CNT-900 | 279.442                                               | 0.976                                                   | 3.673                         |

Table S3 Values of I<sub>D</sub>/I<sub>G</sub> and I<sub>2D</sub>/I<sub>G</sub> of Co-NC/CNT with different pyrolysis temperatures (700 °C, 800 °C and 900 °C).

| Samples       | I <sub>D</sub> /I <sub>G</sub> | I <sub>2D</sub> /I <sub>G</sub> |
|---------------|--------------------------------|---------------------------------|
| Co-NC/CNT-700 | 1.156                          | 0.348                           |
| Co-NC/CNT-800 | 0.981                          | 0.537                           |
| Co-NC/CNT-900 | 0.916                          | 0.533                           |

Table S4 Comparison of representative Co-based water-splitting catalysts in alkaline electrolyte.

| Catalyst                                  | Water electrolysis test (in 1.0 M KOH) | Substrate          | Loading (mg cm <sup>-2</sup> ) | $\eta@10 \text{ mA cm}^{-2}$ (mV) | Reference                            |
|-------------------------------------------|----------------------------------------|--------------------|--------------------------------|-----------------------------------|--------------------------------------|
| CoP mesoporous nanorod arrays             | HER                                    | Ni foam            | 6.2                            | 54                                | Adv. Funct. Mater. 2015, 25, 7337    |
|                                           | OER                                    |                    |                                | 380                               |                                      |
|                                           | Overall water splitting                |                    |                                | 390                               |                                      |
| CoP/rGO                                   | HER                                    | GCE                | 0.28                           | 150                               | Chem. Sci., 2016, 7, 1690            |
|                                           | OER                                    | Carbon fiber cloth |                                | 350                               |                                      |
|                                           | Overall water splitting                |                    |                                | 470                               |                                      |
| porous N-rich carbon/Co                   | HER                                    | GCE                | 0.35                           | 298                               | J. Mater. Chem. A, 2016, 4, 3204     |
|                                           | OER                                    | Ni foam            |                                | 370                               |                                      |
|                                           | Overall water splitting                |                    |                                | 410                               |                                      |
| CoOx@CN                                   | HER                                    | GCE                | 0.42                           | 232                               | J. Am. Chem. Soc. 2015, 137, 2688    |
|                                           | OER                                    | Ni foam            |                                | 1                                 |                                      |
|                                           | Overall water splitting                |                    |                                | 2                                 |                                      |
| Co/N-rich CNT                             | HER                                    | GCE                | 0.28                           | 370                               | Angew. Chem. Int. Ed. 2014, 53, 4372 |
| N-doped crumpled graphene/CoO             | OER                                    | GCE                | 0.071                          | 340                               | Energy Environ. Sci., 2014, 7, 609   |
| Co-P film                                 | HER                                    | Cu foil            | 2.71                           | 95                                | Angew. Chem. Int. Ed. 2015, 54, 6251 |
|                                           | OER                                    |                    |                                | 345                               |                                      |
|                                           | Overall water splitting                |                    |                                | > 400                             |                                      |
| CoP nanowire arrays                       | HER                                    | Carbon cloth       | 0.92                           | 207                               | J. Am. Chem. Soc. 2014, 136, 7587    |
| Surface oxidized CoP nanorods/C           | OER                                    | GCE                | 0.71                           | 320                               | ACS Catal. 2015, 5, 6874             |
|                                           | Overall water splitting                | Ti felt sheet      | 5                              | 357                               |                                      |
| Carbon paper/carbon tubes/Co-S Sheets     | HER                                    | Carbon paper       | 0.32                           | 190                               | ACS Nano, 2016, 10, 2342             |
|                                           | OER                                    |                    |                                | 306                               |                                      |
|                                           | Overall water splitting                |                    |                                | 413                               |                                      |
| Co@carbon nanofibers                      | HER                                    | GCE                | 0.44                           | 196                               | Nano Energy, 2016, 22, 79            |
| Co-C-N                                    | HER                                    | Carbon paper       | 2                              | 178                               | J. Am. Chem. Soc. 2015, 137, 15070   |
| Atomic Co on N-doped graphene             | HER (1 M NaOH)                         | GCE                | 0.285                          | > 250                             | Nat. Commun. 2015, 6, 8668           |
| CoCo layered double hydroxides-nanosheets | OER                                    | GCE                | 0.07                           | 353                               | Nat. Commun. 2014, 5, 4477           |
|                                           |                                        |                    |                                | 393                               |                                      |
| Co3O4 nanocrystal                         | HER                                    | Carbon fiber paper | 0.35                           | 380                               | Chem. Commun., 2015, 51, 8066        |
|                                           | OER                                    |                    |                                | 320                               |                                      |
|                                           | Overall water splitting                |                    |                                | 680                               |                                      |
| Co3O4 nanocages                           | OER                                    | Ni foam            | 1                              | 410                               | J. Am. Chem. Soc. 2015, 137, 5590    |
| Co@N-doped carbon                         | HER                                    | GCE                | \                              | 210                               | J. Mater. Chem. A, 2014, 2, 20067    |
|                                           | OER                                    |                    |                                | 400                               |                                      |
| CoP N-doped carbon                        | HER                                    | GCE                | 0.283                          | 191                               | Chem. Mater., 2015, 27, 7636         |
|                                           | OER                                    |                    |                                | 354                               |                                      |
|                                           | Overall water splitting                |                    | 1                              | > 470                             |                                      |
| Co-NC/CNT                                 | HER                                    | GCE                | 0.306                          | 203                               | This work                            |
|                                           | OER                                    |                    |                                | 354                               |                                      |
|                                           | Overall water splitting                | Ni foam            | 1.2                            | 395                               |                                      |
